# Supplementary material for: Amazonian Plants: A Global Bibliometric Approach to Petiveria alliacea L. Pharmacological and Toxicological Properties
Source: MDPI journal article supplement (doi:10.3390/plants12183343), 2023-09-21
Supplement: s1 [file s1]

## SUPPLEMENTARY INFORMATION

### **Amazonian Plants: A global Bibliometric Approach on Pharmacological and Toxicological Properties of *Petiveria alliacea* L.**

Brenda Costa da Conceição<sup>1</sup>, Thales Andrade da Silva<sup>1</sup>, Lucas Villar Pedrosa da Silva Pantoja<sup>1</sup>, Diandra Araújo Luz<sup>1</sup>, Eloise Karolina Serrão Cardoso<sup>1</sup>, Laryssa Danielle da Silva Reis<sup>1</sup>, Maria Carolina Raiol da Silva<sup>1</sup>, Monique Silva Kussler<sup>1</sup>, Cristiane do Socorro Ferraz Maia<sup>1</sup>, Enéas de Andrade Fontes-Júnior<sup>1,\*</sup>

*1 Laboratory of Inflammation and Behavioral Pharmacology, Health Science Institute, Federal University of Pará, Belém-PA, Brazil.*

*\* Corresponding author.*

# CONTENTS

**Page 2. Supplementary Information1.** List of excluded articles.

| Authors                                                                                     | Article Title                                                                                                                                                                                | Journal                           | WoS-CC citations | Reason for exclusion                                     |
|---------------------------------------------------------------------------------------------|----------------------------------------------------------------------------------------------------------------------------------------------------------------------------------------------|-----------------------------------|------------------|----------------------------------------------------------|
| Alvarez, NH; Stegmayer, MI; Seimandi, GM; Pensiero, JF; Zabala, JM; Favaro, MA; Derita, MG  | Natural Products Obtained from Argentinean Native Plants Are Fungicidal Against Citrus Postharvest Diseases                                                                                  | Horticulturae                     | 0                | Focus on Agricultural Sciences                           |
| Herrera-Gorocica, AM; Ruiz-Sanchez, E; Ballina-Gomez, HS; Reyes-Solis, G; Sanchez-Lazaro, A | Response of Bemisia Tabaci Genn To the Association Tomato-Aromatic Plant                                                                                                                     | Agrociencia                       | 0                | Focus on Agricultural Sciences                           |
| Wooten, J; Mavingire, N; Araujo, CA; Aja, J; Wauchope, S; Delgoda, R; Brantley, E           | Dibenzyl Trisulfide Induces Caspase-Independent Death and Lysosomal Membrane Permeabilization Of Triple-Negative Breast Cancer Cells                                                         | Fitoterapia                       | 1                | Focus on <i>Petiveria alliacea</i> secondary metabolites |
| Clarke, N; Irvine, W                                                                        | <i>In Silico</i> Design and SAR Study of Dibenzyl Trisulfide Analogues for Improved CYP1A1 Inhibition                                                                                        | Chemistryopen                     | 1                | Focus on <i>Petiveria alliacea</i> secondary metabolites |
| Olajubutu, OG; Ogunremi, BI; Adewole, AH; Awotuya, OI; Fakola, EG; Anyim, G; Faloye, KO     | Correction To: Topical Anti-Inflammatory Activity of <i>Petiveria alliacea</i> , Chemical Profiling and Computational Investigation of Phytoconstituents Identified from its Active Fraction | Chemistry Africa                  | 0                | Correction letter                                        |
| Lopez, JJ; Chirinos, DT; Ponce, WH; Solorzano, RF; Alarcon, JP                              | Insecticide Activity of Botanical Formulates on The Fall Armyworm, <i>Spodoptera frugiperda</i> (Lepidoptera: Noctuidae)                                                                     | Revista Colombiana de Entomologia | 0                | Focus on Agricultural Sciences                           |
| Kujawska, M; Schmeda-Hirschmann, G                                                          | The Use of Medicinal Plants by Paraguayan Migrants in The Atlantic Forest of Misiones, Argentina, Is Based on Guarani Tradition, Colonial and Current Plant Knowledge                        | Journal of Ethnopharmacology      | 8                | Ethnopharmacological study                               |

|                                                                                                                                |                                                                                                                                                                                                         |                                     |    |                                                          |
|--------------------------------------------------------------------------------------------------------------------------------|---------------------------------------------------------------------------------------------------------------------------------------------------------------------------------------------------------|-------------------------------------|----|----------------------------------------------------------|
| Wauchope, S; Roy, MA; Irvine, W; Morrison, I; Brantley, E; Gossell-Williams, M; Timme-Laragy, AR; Delgoda, R                   | Dibenzyl Trisulfide Binds to And Competitively Inhibits the Cytochrome P450 1A1 Active Site Without Impacting the Expression of The Aryl Hydrocarbon Receptor                                           | Toxicology and Applied Pharmacology | 3  | Focus on <i>Petiveria alliacea</i> secondary metabolites |
| Flota-Burgos, GJ; Rosado-Aguilar, JA; Rodriguez-Vivas, RI; Borges-Argaez, R; Martinez-Ortiz-de-Montellano, C; Gamboa-Angulo, M | Anthelmintic Activity of Extracts and Active Compounds from diospyros <i>Anisandraonancylostoma caninum</i> , <i>Haemonchus placei</i> and <i>Cyathostomins</i>                                         | Frontiers in Veterinary Science     | 7  | <i>Petiveria alliacea</i> is not the focus of the paper  |
| Pettinelli, JD; Soares, BD; Collin, M; Mansur, EA; Engelmann, F; Gagliardi, RF                                                 | Cryotolerance Of Somatic Embryos of Guinea ( <i>Petiveria Alliacea</i> ) To V-Cryoplate Technique and Histological Analysis of Their Structural Integrity                                               | Acta Physiologiae Plantarum         | 2  | Plant anatomy study                                      |
| Figueroa Gualteros, AM; Castro Trivino, EA; Castro Salazar, HT                                                                 | Bioplaguicide Effect of Vegetal Extracts to Control of <i>Spodoptera frugiperda</i> in Corn Crop ( <i>Zea mays</i> )                                                                                    | Acta Biologica Colombiana           | 3  | Focus on Agricultural Sciences                           |
| He, TY; Chambers, MI; Musah, RA                                                                                                | Application of Direct Analysis in Real Time-High Resolution Mass Spectrometry to Investigations of Induced Plant Chemical Defense Mechanisms-Revelation of Negative Feedback Inhibition of An Alliinase | Analytical Chemistry                | 3  | Plant physiology study                                   |
| Violeth, JLB; Herrera, CF; Garcia, KDP                                                                                         | Plant Extracts: Alternative Control <i>Colaspis sp.</i> (Coleoptera: Chrysomelidae) In Banana Cv. Harton                                                                                                | Temas Agrarios                      | 1  | Focus on Agricultural Sciences                           |
| Drane, E; Feliot-Rippeault, M; Smith-Ravin, J; Marcelin, O                                                                     | Ethnobotanical Study in Martinique of the Species Behind the Local Plant Name Bwa Kaka                                                                                                                  | Ethnobiology Letters                | 1  | Ethnopharmacological study                               |
| He, TY; Misuraca, JC; Musah, RA                                                                                                | Carboranyl-Cysteine-Synthesis, Structure and Self-Assembly Behavior of a Novel Alpha-Amino Acid                                                                                                         | Scientific Reports                  | 16 | Chemical synthesis study                                 |

|                                                                                             |                                                                                                                                                                                                |                                                 |    |                                                         |
|---------------------------------------------------------------------------------------------|------------------------------------------------------------------------------------------------------------------------------------------------------------------------------------------------|-------------------------------------------------|----|---------------------------------------------------------|
| de Melo, KA; Carrenho, R                                                                    | Growth and Mycorrhizal Colonization of Maize Plants Treated with Aqueous Extracts from Nonmycorrhizal Weeds                                                                                    | Pesquisa Agropecuaria Brasileira                | 0  | Focus on Agricultural Sciences                          |
| Foster, K; Younger, N; Aiken, W; Brady-West, D; Delgoda, R                                  | Reliance on Medicinal Plant Therapy Among Cancer Patients in Jamaica                                                                                                                           | Cancer causes & Control                         | 22 | Ethnopharmacological study                              |
| Silvaroli, JA; Pleshinger, MJ; Banerjee, S; Kiser, PD; Golczak, M                           | Enzyme That Makes You Cry-Crystal Structure of Lachrymatory Factor Synthase from <i>Allium cepa</i>                                                                                            | Acs Chemical Biology                            | 13 | <i>Petiveria alliacea</i> is not the focus of the paper |
| Pettinelli, JD; Soares, BD; Cantelmo, L; Garcia, RD; Mansur, E; Engelmann, F; Gagliardi, RF | Cryopreservation of Somatic Embryos from <i>Petiveria alliacea</i> L. By Different Techniques Based on Vitrification                                                                           | In Vitro Cellular & Developmental Biology-Plant | 6  | Plant physiology study                                  |
| Pagani, E; Santos, JDL; Rodrigues, E                                                        | Culture-Bound Syndromes of a Brazilian Amazon Riverine Population: Tentative Correspondence Between Traditional and Conventional Medicine Terms and Possible Ethnopharmacological Implications | Journal of Ethnopharmacology                    | 8  | Ethnopharmacological study                              |
| Sershen; Mdamba, B; Ramdhani, S                                                             | Propagule and Seedling Responses of Three Species Naturalised In Subtropical South Africa To Elevated Temperatures                                                                             | Flora                                           | 0  | Plant physiology study                                  |
| Garcia-Perez, ME; Lemus-Rodriguez, Z; Hung-Arbelo, M; Vistel-Vigo, M                        | Influence of Polyvinylpyrrolidone, Microcrystalline Cellulose and Colloidal Silicon Dioxide on Technological Characteristics of a High-Dose <i>Petiveria alliacea</i> Tablet                   | Drug Development and Industrial Pharmacy        | 0  | Pharmaceutical technology study                         |
| Molina, CM; Pringle, JK; Saumett, M; Evans, GT                                              | Geophysical and Botanical Monitoring of Simulated Graves in a Tropical Rainforest, Colombia, South America                                                                                     | Journal Of Applied Geophysics                   | 11 | Geophysical study                                       |

|                                                                                                                                                                  |                                                                                                                                                            |                                                                                |     |                                                                 |
|------------------------------------------------------------------------------------------------------------------------------------------------------------------|------------------------------------------------------------------------------------------------------------------------------------------------------------|--------------------------------------------------------------------------------|-----|-----------------------------------------------------------------|
| Arceo-Medina, GN;<br>Rosado-Aguilar, JA;<br>Rodriguez-Vivas, RI;<br>Borges-Argaez, R                                                                             | Synergistic Action of Fatty<br>Acids, Sulphides and<br>Stilbene Against Acaricide-<br>Resistant Rhipicephalus<br>Microplus Ticks                           | Veterinary Parasitology                                                        | 11  | Focus on <i>Petiveria<br/>alliacea</i> secondary<br>metabolites |
| Kasper, SH; Bonocora,<br>RP; Wade, JT; Musah,<br>RA; Cady, NC                                                                                                    | Chemical Inhibition of<br>Kynureninase Reduces<br>Pseudomonas Aeruginosa<br>Quorum Sensing and<br>Virulence Factor Expression                              | Acs Chemical Biology                                                           | 28  | Focus on <i>Petiveria<br/>alliacea</i> secondary<br>metabolites |
| Oliveira, GL; Oliveira,<br>AFM; Andrade, LDC                                                                                                                     | Medicinal and Toxic Plants<br>from Muribeca Alternative<br>Health Center (Pernambuco,<br>Brazil): An<br>Ethnopharmacology Survey                           | Boletin Latinoamericano Y<br>Del Caribe De Plantas<br>Medicinales Y Aromaticas | 2   | Ethnopharmacological<br>study                                   |
| Lim, J; Pyun, J; Char, K                                                                                                                                         | Recent Approaches for The<br>Direct Use of Elemental<br>Sulfur in The Synthesis and<br>Processing of Advanced<br>Materials                                 | Angewandte Chemie-<br>International Edition                                    | 189 | Chemical synthesis<br>study                                     |
| Granados-Echegoyen, C;<br>Perez-Pacheco, R;<br>Bautista-Martinez, N;<br>Alonso-Hernandez, N;<br>Sanchez-Garcia, JA;<br>Martinez-Tomas, SH;<br>Sanchez-Mendoza, S | Insecticidal Effect of<br>Botanical Extracts on<br>Developmental Stages of<br><i>Bactericera cockerelli</i> (Sulc)<br>(Hemiptera: Triozidae)               | Southwestern Entomologist                                                      | 8   | Bioplaguicide study                                             |
| Kuo, PC; Thang, TD;<br>Huang, GJ; Huang, BS;<br>Hoa, LTM; Yang, ML;<br>Wu, TS                                                                                    | Flavonoids from The Fruits<br>of <i>Desmos cochinchinesis</i> Var.<br>Fulvencens and Their<br>Inhibitory Effects on no<br>Production                       | Chemistry Of Natural<br>Compounds                                              | 3   | <i>Petiveria alliacea</i> is not<br>the focus of the paper      |
| Kasper, SH; Samarian, D;<br>Jadhav, AP; Rickard, AH;<br>Musah, RA; Cady, NC                                                                                      | S-Aryl-L-Cysteine<br>Sulphoxides and Related<br>Organosulphur Compounds<br>Alter Oral Biofilm<br>Development And AI-2-<br>Based Cell-Cell<br>Communication | Journal Of Applied<br>Microbiology                                             | 10  | Focus on <i>Petiveria<br/>alliacea</i> secondary<br>metabolites |
| Kerdudo, A; Gonot, V;<br>Ellong, EN; Rochefort, K;<br>Boyer, L; Michel, T;<br>Fernandez, X                                                                       | New Antibacterial<br>Compounds from Plant<br>Biodiversity                                                                                                  | Planta Medica                                                                  | 1   | Meeting Abstract                                                |

|                                                                                                         |                                                                                                                                                                                                                 |                                                                   |    |                                                          |
|---------------------------------------------------------------------------------------------------------|-----------------------------------------------------------------------------------------------------------------------------------------------------------------------------------------------------------------|-------------------------------------------------------------------|----|----------------------------------------------------------|
| Patra, JK; Kim, ES; Oh, K; Kim, HJ; Kim, Y; Baek, KH                                                    | Antibacterial Effect of Crude Extract and Metabolites of <i>Phytolacca americana</i> on Pathogens Responsible for Periodontal Inflammatory Diseases and Dental Caries                                           | BMC Complementary and Alternative Medicine                        | 34 | <i>Petiveria alliacea</i> is not the focus of the paper  |
| Lowe, HIC; Facey, COB; Toyang, NJ; Bryant, JL                                                           | Specific RSK Kinase Inhibition by Dibenzyl Trisulfide and Implication for Therapeutic Treatment of Cancer                                                                                                       | Anticancer Research                                               | 10 | Focus on <i>Petiveria alliacea</i> secondary metabolites |
| Castellar, A; Gagliardi, RF; Mansur, E; Bizzo, HR; Souza, AM; Leita, SG                                 | Volatile Constituents from <i>in vitro</i> and <i>ex vitro</i> Plants of <i>Petiveria alliacea</i> L.                                                                                                           | Journal of Essential Oil Research                                 | 7  | Phytochemical study                                      |
| Leal, CM; Orozco, N; Rivera, J; Monterroso, L; Caceres, A                                               | <i>In Vitro</i> Activity Against Helicobacter Pylori by Ethanol Extracts from Sixteen Medicinal Plants Used for Chronic Gastrointestinal Diseases in Guatemala                                                  | International Symposium on Medicinal Plants and Natural Product S | 3  | Proceedings Paper                                        |
| Lester, DA; Richards, AA; Younger-Coleman, NO; Pepple, DJ                                               | Cilostazol And Blood Viscoelasticity in Homozygous Sickle Cell Disease                                                                                                                                          | British Journal of Biomedical Science                             | 1  | <i>Petiveria alliacea</i> is not the focus of the paper  |
| Cantelmo, L; Soares, BO; Rocha, LP; Pettinelli, JA; Callado, CH; Mansur, E; Castellar, A; Gagliardi, RF | Repetitive Somatic Embryogenesis from Leaves of The Medicinal Plant <i>Petiveria alliacea</i> L.                                                                                                                | Plant Cell Tissue and Organ Culture                               | 14 | Plant physiology study                                   |
| Souza, CR; Guedes, RC; Fusco-Almeida, AM; Oliveira, WP                                                  | Spray Dried <i>Petiveria alliacea</i> Extracts: Standardization and Evaluation of The Antimicrobial Activity                                                                                                    | Planta Medica                                                     | 0  | Meeting Abstract                                         |
| Mitchell, SA                                                                                            | Ethnomedicinal Opportunities for Human Health from Jamaican-Grown Tropical Herbs: Anti-Cancer Guinea Hen Weed ( <i>Petiveria alliacea</i> ), Bitter Herbs, Root Tonics, Nurtaceuticals, Spices and Cold Bushes. | <i>In Vitro</i> Cellular & Developmental Biology-Animal           | 0  | Ethnopharmacological study                               |

|                                                                                                            |                                                                                                                                                    |                                            |     |                                                          |
|------------------------------------------------------------------------------------------------------------|----------------------------------------------------------------------------------------------------------------------------------------------------|--------------------------------------------|-----|----------------------------------------------------------|
| Soares, BO; Fernandes, DC; Cantelmo, L; Rocha, LP; Pettinelli, JA; Christo, AG; Coelho, MGP; Gagliardi, RF | Botanical Characterization of <i>Petiveria alliacea</i> L. from Rio De Janeiro, Brazil: Systematic and Functional Implications                     | Plant Biosystems                           | 4   | Botanical study                                          |
| Joyce, NI; Eady, CC; Silcock, P; Perry, NB; van Klink, JW                                                  | Fast Phenotyping Of LFS-Silenced (Tearless) Onions by Desorption Electrospray Ionization Mass Spectrometry (DESI-MS)                               | Journal of Agricultural and Food Chemistry | 39  | Focus on Agricultural Sciences                           |
| Kubec, R; Krejцова, P; Mansur, L; Garcia, N                                                                | Flavor Precursors and Sensory-Active Sulfur Compounds in Alliaceae Species Native to South Africa And South America                                | Journal of Agricultural and Food Chemistry | 22  | Focus on Agricultural Sciences                           |
| Cruz-Estrada, A; Gamboa-Angulo, M; Borges-Argaez, R; Ruiz-Sanchez, E                                       | Insecticidal Effects of Plant Extracts on Immature Whitefly <i>Bemisia tabaci</i> Genn. (Hemiptera: Aleyroideae)                                   | Electronic Journal Of Biotechnology        | 14  | Bioplaguicide study                                      |
| Ding, LJ; Ding, W; Zhang, YQ; Luo, JX                                                                      | Bioguided Fractionation and Isolation of Esculentoside P from <i>Phytolacca americana</i> L.                                                       | Industrial Crops And Products              | 21  | <i>Petiveria alliacea</i> is not the focus of the paper  |
| Zheng, F; Pratt, DA                                                                                        | Antioxidant Generation and Regeneration in Lipid Bilayers: The Amazing Case of Lipophilic Thiosulfates And Hydrophilic Thiols                      | Chemical Communications                    | 9   | <i>Petiveria alliacea</i> is not the focus of the paper  |
| Freeman, F; Bui, A; Dinh, L; Hehre, WJ                                                                     | Dehydrative Cyclocondensation Mechanisms of Hydrogen Thioperoxide And of Alkanesulfenic Acids                                                      | Journal of Physical Chemistry A            | 7   | <i>Petiveria alliacea</i> is not the focus of the paper  |
| Cruz, LM; Vera, J; Melendez, E; Rivera-Portalatin, N                                                       | Cytotoxic Studies of The Essential Oils of <i>Petiveria alliacea</i> In Colon Cancer Cells                                                         | Planta Medica                              | 1   | Meeting Abstract                                         |
| Cady, NC; McKean, KA; Behnke, J; Kubec, R; Mosier, AP; Kasper, SH; Burz, DS; Musah, RA                     | Inhibition of Biofilm Formation, Quorum Sensing and Infection in <i>Pseudomonas Aeruginosa</i> by Natural Products-Inspired Organosulfur Compounds | Plos One                                   | 140 | Focus on <i>Petiveria alliacea</i> secondary metabolites |

|                                                                                                                                          |                                                                                                                                                                                                                        |                                                  |    |                                                          |
|------------------------------------------------------------------------------------------------------------------------------------------|------------------------------------------------------------------------------------------------------------------------------------------------------------------------------------------------------------------------|--------------------------------------------------|----|----------------------------------------------------------|
| Christie, SLF; Levy, ASA                                                                                                                 | Investigation of Hypoglycemic Activity of Four Extracts of <i>Petiveria alliacea</i> (Guinea Hen Weed) In Normoglycemic Experimental Rat Models                                                                        | Faseb Journal                                    | 0  | Meeting Abstract                                         |
| Masamura, N; Ohashi, W; Tsuge, N; Imai, S; Ishii-Nakamura, A; Hirota, H; Nagata, T; Kumagai, H                                           | Identification of Amino Acid Residues Essential for Onion Lachrymatory Factor Synthase Activity                                                                                                                        | Bioscience Biotechnology And Biochemistry        | 6  | <i>Petiveria alliacea</i> is not the focus of the paper  |
| Nwachukwu, ID; Slusarenko, AJ; Gruhlke, MCH                                                                                              | Sulfur and Sulfur Compounds in Plant Defence                                                                                                                                                                           | Natural Product Communications                   | 31 | Focus on <i>Petiveria alliacea</i> secondary metabolites |
| Santander, SP; Hernandez, JF; Barreto, CC; Masayuki, A; Moins-Teisserenc, H; Fiorentino, S                                               | Immunomodulatory Effects of Aqueous and Organic Fractions from <i>Petiveria Alliacea</i> On Human Dendritic Cells (Vol 40, Pg 833, 2012)                                                                               | American Journal Of Chinese Medicine             | 0  | Correction letter                                        |
| He, Q; Kubec, R; Jadhav, AP; Musah, RA                                                                                                   | First Insights into The Mode of Action of a Lachrymatory Factor Synthase - Implications for The Mechanism of Lachrymator Formation in <i>Petiveria alliacea</i> , <i>Allium cepa</i> And <i>Nectaroscordum</i> Species | Phytochemistry                                   | 11 | Plant physiology study                                   |
| Illnait-Zaragozi, MT; Velar-Martinez, RE; Martinez-Machin, GF; Andreu, CMF; Perurena-Lancha, MR; Illnait-Ferrer, J; Garcia, AB; Meis, JF | Antifungal Effects of a Hydroalcoholic Extract of <i>Petiveria alliacea</i> L on Clinical <i>Candida spp.</i>                                                                                                          | Mycoses                                          | 0  | Meeting Abstract                                         |
| Sahebkar, A; Iranshahi, M                                                                                                                | Volatile Constituents of The Genus <i>ferula</i> (Apiaceae): A Review                                                                                                                                                  | Journal of Essential Oil-Bearing Plants          | 50 | <i>Petiveria alliacea</i> is not the focus of the paper  |
| Druga, B; Suteu, D; Rosca-Casian, O; Parvu, M; Dragos, N                                                                                 | Two Novel <i>Alliin lyase</i> (Alliinase) Genes from Twisted-Leaf Garlic ( <i>Allium obliquum</i> ) and Mountain Garlic ( <i>Allium senescens</i> Var. <i>Montanum</i> )                                               | Notulae Botanicae Horti Agrobotanici Cluj-Napoca | 5  | <i>Petiveria alliacea</i> is not the focus of the paper  |
| Castellar, A; Gagliardi, RF; Mansur, E                                                                                                   | <i>In Vitro</i> Propagation and Establishment of Callus and Cell Suspension Cultures of <i>Petiveria alliacea</i> L., A Valuable Medicinal Plant                                                                       | Journal of Medicinal Plants Research             | 4  | Plant physiology study                                   |



|                                                                                                                                       |                                                                                                                                                                                              |                                                                              |    |                                                                 |
|---------------------------------------------------------------------------------------------------------------------------------------|----------------------------------------------------------------------------------------------------------------------------------------------------------------------------------------------|------------------------------------------------------------------------------|----|-----------------------------------------------------------------|
| Baez, C; Rodriguez, F;<br>Ospina, CA; Pagan, M                                                                                        | Biological Evaluation and<br>Chemical Analysis of<br>Extracts from <i>Petiveria<br/>alliacea</i>                                                                                             | Abstracts of Papers of The<br>American Chemical Society                      | 0  | Meeting Abstract                                                |
| Amaral, ACF; Silva, JRD;<br>Falcao, DQ; Ferreirinha,<br>LG; dos Santos, AR;<br>Araujo, RB; Ferreira, JLP                              | Chemical Analysis of Toxic<br>Principles in Preparations of<br><i>Ruta graveolens</i> And <i>Petiveria<br/>alliacea</i>                                                                      | Poisoning by Plants,<br>Mycotoxins, And Related<br>Toxins                    | 0  | Phytochemical study                                             |
| Lynett, PT; Butts, K;<br>Vaidya, V; Garrett, GE;<br>Pratt, DA                                                                         | The Mechanism of Radical-<br>Trapping Antioxidant<br>Activity of Plant-Derived<br>Thiosulfates                                                                                               | Organic & Biomolecular<br>Chemistry                                          | 41 | Focus on <i>Petiveria<br/>alliacea</i> secondary<br>metabolites |
| Neves, ID; da Camara,<br>CAG; de Oliveira, JCS; de<br>Almeida, AV                                                                     | Acaricidal Activity and<br>Essential Oil Composition of<br><i>Petiveria alliacea</i> L. From<br>Pernambuco (Northeast<br>Brazil)                                                             | Journal of Essential Oil<br>Research                                         | 12 | Bioplaguicide study                                             |
| Mayorga, P; Perez, KR;<br>Cruz, SM; Caceres, A                                                                                        | Comparison of Bioassays<br>Using the Anostracan<br>Crustaceans <i>Artemia Salina</i><br>and <i>Thamnocephalus<br/>platyurus</i> For Plant Extract<br>Toxicity Screening                      | Revista Brasileira de<br>Farmacognosia-Brazilian<br>Journal of Pharmacognosy | 24 | Bioplaguicide study                                             |
| Pepple, DJ; Richards,<br>AA; Lowe, DA; Reid,<br>WA; Younger, NO;<br>Williams, LAD                                                     | <i>In Vitro</i> Erythrocytic<br>Membrane Effects of<br>Dibenzyl Trisulfide, A<br>Secondary Metabolite of<br><i>Petiveria alliacea</i>                                                        | Fitoterapia                                                                  | 5  | Focus on <i>Petiveria<br/>alliacea</i> secondary<br>metabolites |
| Sahebkar, A; Iranshahi,<br>M                                                                                                          | Biological Activities of<br>Essential Oils from The<br><i>Genus Ferula</i> (Apiaceae)                                                                                                        | Asian Biomedicine                                                            | 65 | <i>Petiveria alliacea</i> is not<br>the focus of the paper      |
| de Oliveira, GL; de<br>Oliveira, AFM; Andrade,<br>LDC                                                                                 | Medicinal Plants Used in<br>The Urban Community of<br>Muribeca, Northeast Brazil                                                                                                             | Acta Botanica Brasilica                                                      | 27 | Ethnopharmacological<br>study                                   |
| Rosado-Aguilar, JA;<br>Aguilar-Caballero, A;<br>Rodriguez-Vivas, RI;<br>Borges-Argaez, R;<br>Garcia-Vazquez, Z;<br>Mendez-Gonzalez, M | Acaricidal Activity of<br>Extracts from <i>Petiveria<br/>alliacea</i> (Phytolaccaceae)<br>Against the Cattle Tick,<br><i>Rhipicephalus</i> (Boophilus)<br><i>Microplus</i> (Acari: Ixodidae) | Veterinary Parasitology                                                      | 70 | Bioplaguicide study                                             |

|                                                                                                                                   |                                                                                                                                                                                                                                   |                                                                          |    |                                                          |
|-----------------------------------------------------------------------------------------------------------------------------------|-----------------------------------------------------------------------------------------------------------------------------------------------------------------------------------------------------------------------------------|--------------------------------------------------------------------------|----|----------------------------------------------------------|
| Martinez, GJ                                                                                                                      | Natural Remedies in The Prevention and Oral Health Care of The Toba From Central Chaco (Argentina)                                                                                                                                | Boletin Latinoamericano Y Del Caribe De Plantas Medicinales Y Aromaticas | 10 | Ethnopharmacological study                               |
| Kubec, R; Cody, RB; Dane, AJ; Musah, RA; Schraml, J; Vattekkatte, A; Block, E                                                     | Applications of Direct Analysis in Real Time-Mass Spectrometry (DART-MS) In Allium Chemistry. (Z)-Butanethial S-Oxide And 1-Butenyl Thiosulfinates And Their S-(E)-1-Butenylcysteine S-Oxide Precursor from <i>Allium sicutum</i> | Journal of Agricultural and Food Chemistry                               | 72 | Chemical synthesis study                                 |
| Xu, WH; Xi, B; Wu, JY; An, HY; Zhu, J; Abassi, Y; Feinstein, SC; Gaylord, M; Geng, BQ; Yan, HF; Fan, WM; Sui, MH; Wang, XB; Xu, X | Natural Product Derivative Bis(4-Fluorobenzyl) Trisulfide Inhibits Tumor Growth by Modification of Beta-Tubulin at Cys 12 and Suppression of Microtubule Dynamics                                                                 | Molecular Cancer Therapeutics                                            | 20 | Focus on <i>Petiveria alliacea</i> secondary metabolites |
| Musah, RA; He, Q; Kubec, R                                                                                                        | Discovery and Characterization of a Novel Lachrymatory Factor Synthase in <i>Petiveria alliacea</i> and its Influence on Alliinase-Mediated Formation of Biologically Active Organosulfur Compounds                               | Plant Physiology                                                         | 27 | Plant physiology study                                   |
| Musah, RA; He, Q; Kubec, R; Jadhav, A                                                                                             | Studies of a Novel Cysteine Sulfoxide Lyase From <i>Petiveria alliacea</i> : The First Heteromeric Alliinase                                                                                                                      | Plant Physiology                                                         | 15 | Focus on <i>Petiveria alliacea</i> secondary metabolites |
| Williams, LAD; Barton, EN; Kraus, W; Rosner, H                                                                                    | Implications of Dibenzyl Trisulphide For Disease Treatment Based on Its Mode of Action                                                                                                                                            | West Indian Medical Journal                                              | 6  | Focus on <i>Petiveria alliacea</i> secondary metabolites |
| Singh, SP; Lough, AJ; Schwan, AL                                                                                                  | Bis(2-Bromobenzyl) Trisulfide                                                                                                                                                                                                     | Acta Crystallographica Section E-Crystallographic Communications         | 0  | Chemical synthesis study                                 |

|                                                                             |                                                                                                                                                                                   |                                                   |    |                                                          |
|-----------------------------------------------------------------------------|-----------------------------------------------------------------------------------------------------------------------------------------------------------------------------------|---------------------------------------------------|----|----------------------------------------------------------|
| Gardiano, CG; Ferraz, S; Lopes, EA; Ferreira, PA; Amora, DX; de Freitas, LG | Evaluation of Plant Aqueous Extracts, Added into The Soil, on Meloidogyne Javanica (Treub, 1885) Chitwood, 1949                                                                   | Semina-Ciencias agrarias                          | 10 | Focus on Agricultural Sciences                           |
| Illnait-Zaragozi, MT; Illnait-Ferrer, J; Garcia, AB                         | Evaluation of The Antimycotic Effect of <i>Petiveria alliacea</i> L                                                                                                               | Mycoses                                           | 0  | Meeting Abstract                                         |
| Bao, YM; Mo, XP; Xu, XY; He, YY; Xu, X; An, HY                              | Stability Studies of Anticancer Agent Bis(4-Fluorobenzyl) Trisulfide And Synthesis of Related Substances                                                                          | Journal of Pharmaceutical and Biomedical Analysis | 14 | Focus on <i>Petiveria alliacea</i> secondary metabolites |
| Rodrigues, E; Gianfratti, B; Tabach, R; Negri, G; Mendes, FR                | Preliminary Investigation of The Central Nervous System Effects of 'Tira-Capeta' (Removing the Devil), A Cigarette Used by Some Quilombolas Living in Pantanal Wetlands of Brazil | Phytotherapy Research                             | 8  | Ethnopharmacological study                               |
| Webster, SA; Mitchell, SA; Gallimore, WA; Williams, LAD; Ahmad, MH          | Biosynthesis of Dibenzyl Trisulfide (DTS) From Somatic Embryos and Rhizogenous/Embryogenic Callus Derived from Guinea Hen Weed ( <i>Petiveria alliacea</i> L.) Leaf Explants      | In Vitro Cellular & Developmental Biology-Plant   | 8  | Focus on <i>Petiveria alliacea</i> secondary metabolites |
| Iranshahi, M; Hassanzadeh-Khayat, M; Bazzaz, BSF; Sabeti, Z; Enayati, F     | High Content of Polysulphides In the Volatile Oil of <i>Ferula latisecta</i> Rech. R. Et Aell. Fruits and Antimicrobial Activity of The Oil                                       | Journal of Essential Oil Research                 | 31 | Focus on <i>Petiveria alliacea</i> secondary metabolites |
| Okada, Y; Tanaka, K; Sato, E; Okajima, H                                    | Antioxidant Activity of the New Thiosulfinate Derivative, S-Benzyl Phenylmethanethiosulfinate, From <i>Petiveria Alliacea</i> L.                                                  | Organic & Biomolecular Chemistry                  | 25 | Focus on <i>Petiveria alliacea</i> secondary metabolites |
| Garcia-Mateos, MR; Sanchez, EE; Espinosa-Robles, P; Alvarez-Sanchez, ME     | Toxicity of <i>Petiveria alliacea</i> L. On Greenhouse Whitefly ( <i>Trialeurodes vaporariorum</i> WEST.)                                                                         | Interciencia                                      | 8  | Bioplaguicide study                                      |

|                                                                                              |                                                                                                                                           |                                                                                                       |     |                                                          |
|----------------------------------------------------------------------------------------------|-------------------------------------------------------------------------------------------------------------------------------------------|-------------------------------------------------------------------------------------------------------|-----|----------------------------------------------------------|
| Mitchell, SA; Ahmad, MH                                                                      | Medicinal Plant Biotechnology Research in Jamaica - Challenges and Opportunities                                                          | Proceedings of The International Symposium on Medicinal and Nutraceutical Plants                      | 2   | Biotechnology study                                      |
| Williams, LAD; Rosner, H; Levy, H; Barton, EN                                                | A Critical Review of The Therapeutic Potential of Dibenzyl Trisulphide Isolated from <i>Petiveria alliacea</i> L (Guinea Hen Weed, Anamu) | West Indian Medical Journal                                                                           | 35  | Focus on <i>Petiveria alliacea</i> secondary metabolites |
| An, HY; Zhu, J; Wang, XB; Xu, X                                                              | Synthesis and Anti-Tumor Evaluation of New Trisulfide Derivatives                                                                         | Bioorganic & Medicinal Chemistry Letters                                                              | 28  | Focus on <i>Petiveria alliacea</i> secondary metabolites |
| Mitchell, SA; Ahmad, MH                                                                      | A Review of Medicinal Plant Research at The University of The West Indies, Jamaica, 1948-2001                                             | West Indian Medical Journal                                                                           | 60  | Ethnopharmacological study                               |
| Kim, S; Kubec, R; Musah, RA                                                                  | Antibacterial and Antifungal Activity of Sulfur-Containing Compounds from <i>Petiveria alliacea</i> L.                                    | Journal of Ethnopharmacology                                                                          | 94  | Focus on <i>Petiveria alliacea</i> secondary metabolites |
| Caceres, A; Gupta, MP; Ocampo, RA; Mendoza, J; Herrera, MR; Solis, PN; Cruz, SM; Martinez, V | Multidisciplinary Development of Phytotherapeutic Products from Native Central American Plants                                            | Proceedings of The Fourth International Conference on Quality and Safety Issues Related to Botanicals | 3   | Proceedings Paper                                        |
| Lans, CA                                                                                     | Ethnomedicines Used in Trinidad And Tobago For Urinary Problems and Diabetes Mellitus                                                     | Journal of Ethnobiology and Ethnomedicine                                                             | 221 | Ethnopharmacological study                               |
| Duarte, MR; Lopes, JF                                                                        | Leaf and Stem Morphoanatomy of <i>Petiveria alliacea</i>                                                                                  | Fitoterapia                                                                                           | 9   | Botanical study                                          |
| Kubec, R; Musah, RA                                                                          | Gamma-Glutamyl Dipeptides in <i>Petiveria alliacea</i>                                                                                    | Phytochemistry                                                                                        | 12  | Phytochemical study                                      |
| Musah, RA; Kim, E; Kubec, R                                                                  | Antibacterial and Antifungal Activity of Sulfur-Containing Compounds from <i>Petiveria alliacea</i> L.                                    | Phosphorus Sulfur and Silicon and the Related Elements                                                | 6   | Focus on <i>Petiveria alliacea</i> secondary metabolites |

|                                                                                  |                                                                                                                                                                             |                                                                                                                                                                                  |    |                                                                       |
|----------------------------------------------------------------------------------|-----------------------------------------------------------------------------------------------------------------------------------------------------------------------------|----------------------------------------------------------------------------------------------------------------------------------------------------------------------------------|----|-----------------------------------------------------------------------|
| Peraza-Sanchez, SR;<br>Chan-Che, EO; Ruiz-<br>Sanchez, E                         | Screening of Yucatecan<br>Plant Extracts to Control<br>Colletotrichum<br>Gloeosporioides And<br>Isolation of a New Pimarene<br>from <i>Acacia pennatula</i>                 | Journal of Agricultural and<br>Food Chemistry                                                                                                                                    | 18 | Focus on Agricultural<br>Sciences                                     |
| Perez-Leal, R; Garcia-<br>Mateos, MR; Vasquez-<br>Rojas, TR; Colinas-Leon,<br>TC | Allelopathic Potential of<br><i>Petiveria alliacea</i> L.                                                                                                                   | Agronomy for Sustainable<br>Development                                                                                                                                          | 7  | Focus on Agricultural<br>Sciences                                     |
| Webster, SA; Mitchell,<br>SA; Ahmad, MH                                          | Somatic Embryogenic<br>Response of <i>Petiveria alliacea</i><br>Leaf Explant-Derived Callus<br>to Sucrose and Glucose<br>Enriched Media<br>Supplemented with NAA<br>and BAP | <i>In Vitro</i> Cellular &<br>Developmental Biology-<br>Animal                                                                                                                   | 2  | Plant physiology study                                                |
| Nascimento, C; Moura, A                                                          | Effect of <i>Petiveria alliacea</i> L.<br>Extracts on Pleural<br>Macrophages and on BCG-<br>Induced Inflammatory<br>Response                                                | Immunology 2004:<br>Genomic Issues, Immune<br>System Activation and<br>Allergy                                                                                                   | 0  | Proceedings Paper                                                     |
| Zuluaga, H; Oviedo, A;<br>Solarte, E; Pena, EJ                                   | Light Stress Effect and By<br>Nitrogen Deficiency in<br>Plants of <i>Petiveria alliacea</i><br>Measured with Two<br>Chlorophyll Fluorescence<br>Technique                   | Riao/Optilas 2004: 5th<br>Iberoamerican Meeting on<br>Optics And 8th Latin<br>American Meeting on<br>Optics, Lasers, And Their<br>Applications, Pts 1-3: Ico<br>Regional Meeting | 0  | Proceedings Paper                                                     |
| Williams, LAD; Vasquez,<br>E; Klaiber, I; Kraus, W;<br>Rosner, H                 | A Sulfonic Anhydride<br>Derivative from Dibenzyl<br>Trisulphide With Agro-<br>Chemical Activities                                                                           | Chemosphere                                                                                                                                                                      | 12 | Focus on <i>Petiveria</i><br><i>alliacea</i> secondary<br>metabolites |
| Kubec, R; Kim, S; Musah,<br>RA                                                   | The Lachrymatory Principle<br>of <i>Petiveria alliacea</i>                                                                                                                  | Phytochemistry                                                                                                                                                                   | 31 | Plant physiology study                                                |
| Kubec, R; Kim, S; Musah,<br>RA                                                   | S-Substituted Cysteine<br>Derivatives and<br>Thiosulfinate Formation in<br><i>Petiveria alliacea</i> - Part II                                                              | Phytochemistry                                                                                                                                                                   | 39 | Phytochemical study                                                   |
| Kim, S; Kubec, R; Musah,<br>RA                                                   | Anticancer, Antibacterial<br>and Antifungal Activities of<br>Sulfur-Containing<br>Compounds from <i>Petiveria</i><br><i>alliacea</i> .                                      | Abstracts of Papers of The<br>American Chemical Society                                                                                                                          | 0  | Meeting Abstract                                                      |

|                                                                                         |                                                                                                                                                               |                                                        |    |                                                           |
|-----------------------------------------------------------------------------------------|---------------------------------------------------------------------------------------------------------------------------------------------------------------|--------------------------------------------------------|----|-----------------------------------------------------------|
| Zoghbi, MDB; Andrade, EHA; Maia, JGS                                                    | Volatile Constituents from <i>Adenocalymma Alliaceum miers</i> And <i>Petiveria alliaceae</i> L., Two Medicinal Herbs of The Amazon                           | Flavour And Fragrance Journal                          | 24 | Phytochemical study                                       |
| Kubec, R; Musah, RA                                                                     | Cysteine Sulfoxide Derivatives in <i>Petiveria alliaceae</i>                                                                                                  | Phytochemistry                                         | 54 | Focus on <i>Petiveria alliaceae</i> secondary metabolites |
| Cifuentes, CM; Gomez-Serranillos, MP; Iglesias, I; del Fresno, AMV                      | Neuropharmacological Profile of Ethnomedicinal Plants of Guatemala                                                                                            | Journal of Ethnopharmacology                           | 21 | Ethnopharmacological study                                |
| Mata-Greenwood, E; Ito, A; Westenburg, H; Cui, BL; Mehta, RG; Kinghorn, AD; Pezzuto, JM | Discovery of Novel Inducers of Cellular Differentiation Using HL-60 Promyelocytic Cells                                                                       | Anticancer Research                                    | 40 | Focus on <i>Petiveria alliaceae</i> secondary metabolites |
| Ayodele, ET; Hudson, HR; Ojo, IAO; Pianka, M                                            | Organosulfur Compounds as a Potential Fungicides: The Preparation and Properties of Some Substituted Benzyl 2-Hydroxyethyl Oligosulfides                      | Phosphorus Sulfur and Silicon and the Related Elements | 7  | Focus on <i>Petiveria alliaceae</i> secondary metabolites |
| Oluwole, FS; Bolarinwa, AF                                                              | The Uterine Contractile Effect of <i>Petiveria alliaceae</i> Seeds                                                                                            | Fitoterapia                                            | 7  | Article not found                                         |
| Johnson, L; Williams, LAD; Roberts, EV                                                  | An Insecticidal and Acaricidal Polysulfide Metabolite from The Roots of <i>Petiveria alliaceae</i>                                                            | Pesticide Science                                      | 25 | Bioplagueicide study                                      |
| DelleMonache, F; Menichini, F; Suarez, LEC                                              | <i>Petiveria alliaceae</i> .2. Further Flavonoids and Triterpenes                                                                                             | Gazzetta Chimica Italiana                              | 19 | Phytochemical study                                       |
| Diaz, OD; Portuondo, MC; Valdes, MG; Chang, RR; Handal, E                               | Comparison of Various Digestion Methods for The Determination of Different Metals in <i>Petiveria alliaceae</i> Lynn (Anamu) By Flame Absorption Spectrometry | Quimica Analitica                                      | 2  | Chemical synthesis study                                  |
| SERTIE, JAA; GERMANO, DHP; SUDO, LS; HANADA, S                                          | <i>Petiveria alliaceae</i> - Analgesic Effect and Preclinical Toxicity                                                                                        | Journal Of Dental Research                             | 2  | Meeting Abstract                                          |
| SERTIE, JAA; HANADA, S; SUDO, LS; GERMANO, DHP                                          | <i>Petiveria alliaceae</i> - Antiinflammatory Effect and Gastric Mucous Protection                                                                            | Journal Of Dental Research                             | 2  | Meeting Abstract                                          |

|                                                                                          |                                                                                                                                                                               |                                                               |     |                                                                       |
|------------------------------------------------------------------------------------------|-------------------------------------------------------------------------------------------------------------------------------------------------------------------------------|---------------------------------------------------------------|-----|-----------------------------------------------------------------------|
| MALPEZZI, ELA;<br>DAVINO, SC; COSTA,<br>LV; FREITAS, JC;<br>GIESBRECHT, AM;<br>ROQUE, NF | Antimitotic Action of<br>Extracts of <i>Petiveria alliacea</i><br>On Sea-Urchin Egg<br>Development                                                                            | Brazilian Journal of<br>Medical and Biological<br>Research    | 14  | Proceedings Paper                                                     |
| DELLEMONACHE, F;<br>SUAREZ, LEC                                                          | 6-C-Formyl And 6-C-<br>Hydroxymethyl Flavanones<br>from <i>Petiveria alliacea</i>                                                                                             | Phytochemistry                                                | 27  | Phytochemical study                                                   |
| GIRON, LM; FREIRE, V;<br>ALONZO, A; CACERES,<br>A                                        | Ethnobotanical Survey of<br>The Medicinal Flora Used by<br>The Caribs Of Guatemala                                                                                            | Journal of<br>Ethnopharmacology                               | 138 | Ethnopharmacological<br>study                                         |
| DESOUZA, JR;<br>DEMUNER, AJ;<br>PINHEIRO, JA;<br>BREITMAIER, E;<br>CASSELS, BK           | Dibenzyl Trisulfide And<br>Trans-N-Methyl-4-<br>Methoxyproline From<br><i>Petiveria alliacea</i>                                                                              | Phytochemistry                                                | 35  | Focus on <i>Petiveria</i><br><i>alliacea</i> secondary<br>metabolites |
| Segelman, FP; Segelman,<br>AB                                                            | Constituents of <i>Petiveria</i><br><i>alliacea</i> L (Phytolaccaceae) .1.<br>Isolation of Isoarborinol,<br>Isoarborinol Acetate and<br>Isoarborinol Cinnamate<br>From Leaves | Lloydia-The Journal of<br>Natural Products                    | 5   | Meeting Abstract                                                      |
| Adesogan, EK                                                                             | Trithiolaniacin, A Novel<br>Trithiolan From <i>Petiveria-</i><br><i>alliacea</i>                                                                                              | Journal of The Chemical<br>Society-Chemical<br>Communications | 21  | Phytochemical study                                                   |
| Szczepan, CV; Zgorzela,<br>P; Hoyer, GA                                                  | Isolation, Structure<br>Elucidation, and Synthesis<br>of an Antimicrobial<br>Substance from <i>Petiveria-</i><br><i>alliacea</i> L                                            | Arzneimittel-<br>Forschung/Drug Research                      | 6   | Chemical synthesis<br>study                                           |
